# Supplementary material for: Identification of novel molecular markers of mastitis caused by Staphylococcus aureus using gene expression profiling in two consecutive generations of Chinese Holstein dairy cattle
Source: PubMed Central journal article supplement (PMC7488426; doi:10.1186/s40104-020-00494-7), 2020-09-28
Supplement: 40104_2020_494_MOESM2_ESM.pdf [file 40104_2020_494_MOESM2_ESM.pdf]

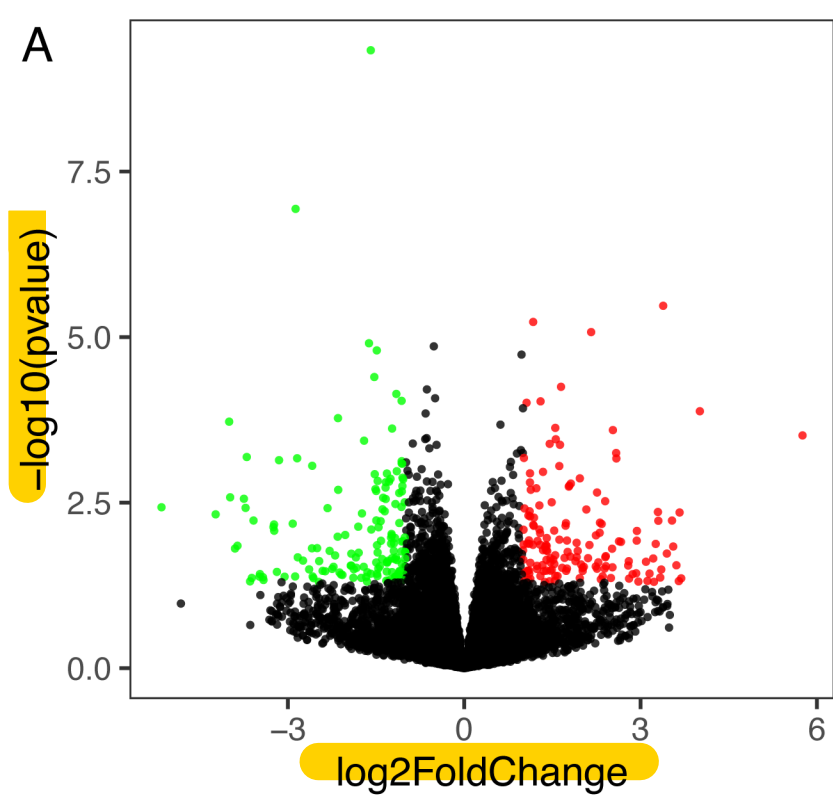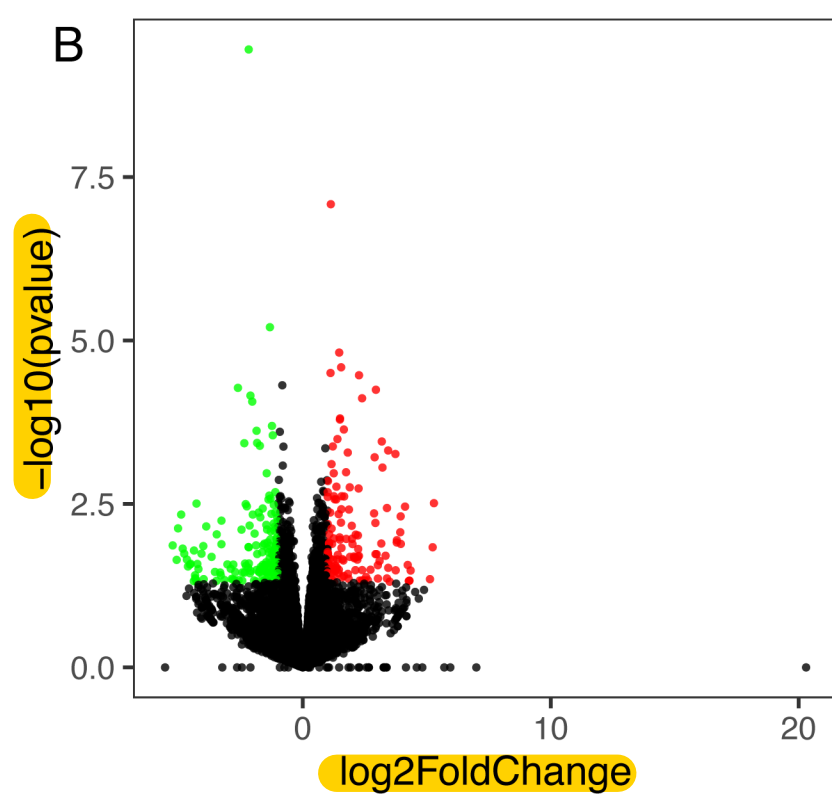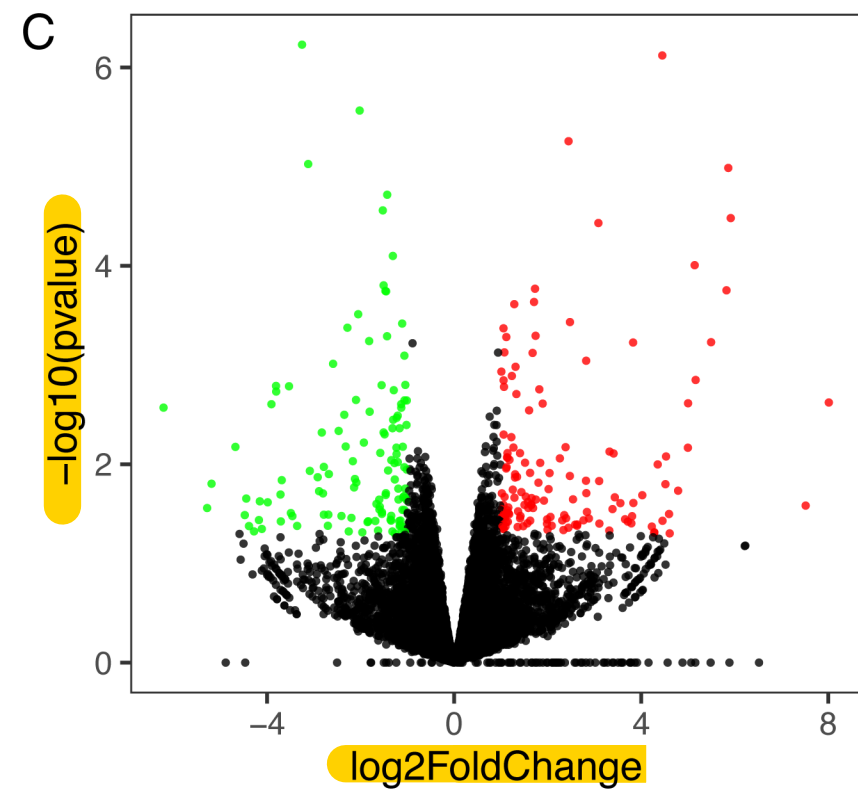

- Up-regulated
- Down-regulated
- Not significant
