# Supplementary material for: Identification of novel molecular markers of mastitis caused by Staphylococcus aureus using gene expression profiling in two consecutive generations of Chinese Holstein dairy cattle
Source: J Anim Sci Biotechnol. 2020 Sep 28;11:98. doi: 10.1186/s40104-020-00494-7 (PMC7488426; doi:10.1186/s40104-020-00494-7)
Supplement: Supplementary file 10 — Additional file 10: Table S6. Differentially expressed genes detected in SM vs. HM. [file 40104_2020_494_MOESM10_ESM.xlsx]

## Sheet: Sheet1
Table S6. Differentially expressed genes detected in SM vs. HM
Ensembl_ID	Chr	Start	End	Gene name	log2 fold change	P-value
ENSBTAG00000000377	X	127954722	127992190	BMX	-1.11071	0.00426769
ENSBTAG00000001094	12	31001535	31388275	MTUS2	-1.2493	0.0184222
ENSBTAG00000001139	25	35762361	35768977	ACHE	-1.00177	0.0337684
ENSBTAG00000001260	18	51784174	51792784	PINLYP	-5.03371	0.00746274
ENSBTAG00000001324	1	135336540	135423996	SLCO2A1	-4.00074	0.0446417
ENSBTAG00000001325	17	71518122	71544778	UPB1	-1.14968	0.00714369
ENSBTAG00000001835	9	29748660	29761667	GJA1	-4.39027	0.0162855
ENSBTAG00000001881	10	81503834	81526924	SLC10A1	-1.04668	0.0103315
ENSBTAG00000001961	20	9401263	9494370	MAP1B	-2.36103	0.000372144
ENSBTAG00000002065	13	59366399	59375952	TFAP2C	2.12041	0.0325576
ENSBTAG00000002199	6	66274892	66581597	CORIN	-1.5483	0.0127883
ENSBTAG00000002699	6	70166692	70254044	KIT	1.28351	0.00268071
ENSBTAG00000002845	20	48811787	48998130	CDH10	-1.86626	0.000240275
ENSBTAG00000002859	4	82720173	82744666	-	1.00189	0.00209105
ENSBTAG00000003060	3	13971853	13989966	NTRK1	3.39391	0.00364767
ENSBTAG00000003079	29	43555590	43557005	TIGD3	2.24979	0.00183271
ENSBTAG00000003353	18	23875374	23939382	SLC6A2	-1.84347	0.000368858
ENSBTAG00000003467	25	22514215	22571278	SLC5A11	-1.48802	0.0457924
ENSBTAG00000003510	28	41554852	41570271	MMRN2	-1.32758	0.013919
ENSBTAG00000003724	3	51387228	51406793	BRDT	-1.47221	0.0065982
ENSBTAG00000004099	9	88552142	88616854	CCDC170	-1.12461	0.0296254
ENSBTAG00000004247	17	61409306	61473245	RPH3A	-1.53712	0.0485641
ENSBTAG00000004386	25	9913007	9913678	SOCS1	2.10309	0.0207552
ENSBTAG00000004399	4	57220961	57223087	LRRN3	-1.39247	0.0298876
ENSBTAG00000004653	6	41984735	42116814	ADGRA3	-1.37735	0.0275755
ENSBTAG00000005078	6	60147025	60159287	UCHL1	1.39637	0.000321625
ENSBTAG00000005244	12	32604390	32606967	RASL11A	1.01051	0.0319546
ENSBTAG00000005725	27	35048477	35114325	IDO2	1.53918	0.00610173
ENSBTAG00000005848	10	54636043	54780229	PRTG	-3.89671	0.006973
ENSBTAG00000005965	26	50687923	50723720	ADGRA1	3.16539	0.0127361
ENSBTAG00000005996	28	43214484	43231590	LRRC18	-1.1088	0.00208772
ENSBTAG00000006064	7	11783948	11805417	C7H19orf57	-1.61807	0.00370862
ENSBTAG00000006221	18	25644891	25674917	ADGRG3	-1.45791	0.00107294
ENSBTAG00000006404	18	35338638	35344538	CENPT	1.00316	0.0172001
ENSBTAG00000006484	17	53609590	53614703	-	-1.07762	0.0186967
ENSBTAG00000006859	18	51400717	51406445	-	-2.18303	3.54e-10
ENSBTAG00000006904	5	26903397	26921895	TNS2	-1.29448	0.00830963
ENSBTAG00000006948	11	98027457	98137332	GARNL3	3.50577	0.0488493
ENSBTAG00000006949	13	64841049	64845754	SPAG4	-1.61009	0.0268971
ENSBTAG00000007071	20	39314838	39473962	RAI14	-3.48665	0.047594
ENSBTAG00000007325	25	996893	1000217	TPSB2	-2.4346	0.0352391
ENSBTAG00000007424	17	69262954	69269513	LIF	-1.19696	0.0476639
ENSBTAG00000007450	23	27421810	27433479	C2	-1.17284	0.00325192
ENSBTAG00000007470	7	41228075	41242020	TRIM58	1.01683	0.0182027
ENSBTAG00000007816	6	85829541	85830410	-	-1.47936	0.0246039
ENSBTAG00000007882	11	106722392	106933600	CACNA1B	-3.28372	0.0130414
ENSBTAG00000008035	11	11295693	11296169	-	-4.34277	0.0432124
ENSBTAG00000008140	2	34192288	34271400	FAP	-3.33473	0.0353678
ENSBTAG00000008248	X	111610500	112306889	-	1.05309	0.0126485
ENSBTAG00000008487	25	33581566	33585569	VPS37D	1.19606	0.030732
ENSBTAG00000008592	3	20802181	20811180	FCGR1A	1.4113	0.0189961
ENSBTAG00000008612	5	103358822	103387417	C1R	-1.32693	0.0457404
ENSBTAG00000008684	29	24589163	24590218	-	-3.68003	0.0203801
ENSBTAG00000008923	15	1393141	1407039	GPR83	-1.09503	0.0135888
ENSBTAG00000008942	3	112609162	112657496	NGEF	2.47383	0.0465666
ENSBTAG00000009030	10	15849508	15888340	NOX5	-2.18225	0.0145164
ENSBTAG00000009258	1	138565353	138835292	NEK11	-1.165	0.0319981
ENSBTAG00000009282	X	86646281	86656868	PORCN	1.35513	0.00172101
ENSBTAG00000009371	22	50812881	50840894	CCDC36	-2.30495	0.00318093
ENSBTAG00000009639	18	35723889	35805738	SMPD3	-1.1403	0.024427
ENSBTAG00000009686	24	4244211	4281871	FBXO15	1.01387	0.00141082
ENSBTAG00000009737	7	1519314	1522229	LTC4S	1.10105	0.00428055
ENSBTAG00000009774	22	12723390	12756307	MOBP	2.38515	0.0466332
ENSBTAG00000010047	9	91723944	91866359	TIAM2	-1.06514	0.0107881
ENSBTAG00000010293	2	93255171	93626123	PARD3B	1.65475	0.000229883
ENSBTAG00000010346	6	86004178	86021548	ENAM	-2.3314	0.0258016
ENSBTAG00000010623	11	13434822	13442574	ANKRD53	-1.71501	0.00505953
ENSBTAG00000010661	7	58595964	58710806	DPYSL3	-1.01807	0.0248034
ENSBTAG00000010704	4	92143302	92233611	LRRC4	1.35267	0.0305374
ENSBTAG00000010719	16	60222330	60246517	ANGPTL1	-1.12152	0.0404536
ENSBTAG00000010858	18	16590653	16667410	ABCC11	2.73026	0.0320462
ENSBTAG00000010881	X	4235958	4245145	AKAP14	1.10145	0.0215687
ENSBTAG00000010986	29	48759236	49139386	KCNQ1	4.12358	0.00347407
ENSBTAG00000011186	29	40467592	40477419	BEST1	-3.28264	0.00569165
ENSBTAG00000011195	2	130178487	130179596	-	-1.14252	0.020709
ENSBTAG00000011467	29	43205606	43212737	BATF2	-1.26624	0.00446754
ENSBTAG00000011543	3	120837823	120848740	PDCD1	1.00548	0.00246817
ENSBTAG00000012673	16	3248618	3275153	CDK18	1.84657	0.0440291
ENSBTAG00000012915	18	52062598	52082934	ZNF404	4.30026	0.0470628
ENSBTAG00000013178	X	92485200	92512358	ALAS2	2.62441	0.0462868
ENSBTAG00000013287	4	93108630	93132945	SMO	1.16052	0.0284752
ENSBTAG00000013442	22	48976816	48978925	GPR62	-1.10682	0.0400834
ENSBTAG00000013536	7	14668284	14670849	P2RY11	1.00807	0.0185352
ENSBTAG00000013737	13	66086809	66143601	MROH8	2.22155	0.00956179
ENSBTAG00000013980	6	44387091	44393158	SOD3	1.8933	0.00175905
ENSBTAG00000013983	10	86319206	86327460	ZC2HC1C	-1.86371	0.0323114
ENSBTAG00000014075	13	16140331	16172586	ITIH2	3.02711	0.0273352
ENSBTAG00000014113	19	15807710	15809743	CCL8	-2.29257	0.0279893
ENSBTAG00000014135	27	7631348	7701071	WDR17	1.3686	0.0294368
ENSBTAG00000014194	13	46039122	46276680	ADARB2	-1.69618	0.0290264
ENSBTAG00000014614	26	10626803	10679430	ACTA2	1.34767	0.00270007
ENSBTAG00000014628	17	61338202	61357849	OAS2	-1.29863	0.00261203
ENSBTAG00000014803	6	114791954	114816294	CPZ	1.20948	0.000417194
ENSBTAG00000014859	5	4783613	4796635	CAPS2	-4.40032	0.047973
ENSBTAG00000015061	18	61209482	61224598	-	2.26678	3.4e-05
ENSBTAG00000015246	2	133800882	133813306	TAS1R2	-2.44221	0.0471479
ENSBTAG00000015296	5	42885405	43010556	PTPRB	1.56613	0.00240791
ENSBTAG00000015402	11	86232489	86365887	GREB1	1.90328	0.0203655
ENSBTAG00000015405	15	46407409	46444149	DCHS1	1.12977	8.23e-08
ENSBTAG00000015654	4	12542354	12576328	PON1	4.23123	0.0271113
ENSBTAG00000015702	26	22873667	22885585	PITX3	2.9316	0.0185029
ENSBTAG00000015945	16	2861873	2864026	TMEM81	-1.04878	0.0154163
ENSBTAG00000016041	18	50561044	50562841	B3GNT8	-1.96518	0.0468016
ENSBTAG00000016229	8	46586710	46611498	KLF9	1.06356	0.0129067
ENSBTAG00000016244	25	19784819	19837787	VWA3A	-4.84692	0.0152437
ENSBTAG00000016698	3	9850404	9860647	SLAMF8	-1.20598	0.0296691
ENSBTAG00000017104	3	15427371	15432019	MUC1	-4.67716	0.0223927
ENSBTAG00000017174	22	12236370	12317469	SCN11A	-4.28908	0.00311718
ENSBTAG00000017260	5	89133571	89283293	PDE3A	1.17981	0.0129019
ENSBTAG00000017277	17	71800734	71808096	RAB36	4.29771	0.0471649
ENSBTAG00000017661	7	18305239	18398128	RFX2	1.15778	0.000777167
ENSBTAG00000017746	20	447373	1163533	SLIT3	1.49629	0.000161867
ENSBTAG00000017786	3	9870119	9891157	FCRL6	2.94791	5.67e-05
ENSBTAG00000018028	16	51299216	51327827	TTLL10	-4.0144	0.0139406
ENSBTAG00000018077	18	51674245	51678673	LYPD3	1.4669	1.53e-05
ENSBTAG00000018160	24	39951775	40062824	LAMA1	-4.25567	0.0261516
ENSBTAG00000018181	18	53692708	53694240	CCDC8	3.18583	0.000350448
ENSBTAG00000018539	18	56877780	56886031	KLK1	1.55205	0.00380643
ENSBTAG00000018811	13	52539174	52640959	TMC2	-1.78048	0.00427712
ENSBTAG00000018841	8	98927206	99092707	PTPN3	-2.01913	0.00459768
ENSBTAG00000018917	4	117222455	117226427	EN2	3.44538	0.0299874
ENSBTAG00000019330	22	29859914	29883008	PROK2	-1.424	0.0122644
ENSBTAG00000019382	11	24464835	24474936	PKDCC	3.21314	0.000876888
ENSBTAG00000020056	9	14663442	14776366	COL12A1	-4.28271	0.0485045
ENSBTAG00000020582	25	2178123	2182818	PRSS22	-1.16822	0.0261588
ENSBTAG00000020598	6	102716789	102881084	PPP2R2C	-1.14696	0.0161881
ENSBTAG00000020824	19	41008991	41013346	KRT10	1.86149	0.00385207
ENSBTAG00000021077	23	25607502	25622150	BLA-DQB	3.09505	0.0235629
ENSBTAG00000021118	26	14416061	14419635	CYP26A1	-2.13362	0.0361904
ENSBTAG00000021215	29	26920817	26950666	VWA5A	-1.19995	0.0189428
ENSBTAG00000021313	4	32564174	32731459	RUNDC3B	1.5605	0.0148919
ENSBTAG00000021321	13	59804887	59814236	SDCBP2	3.33796	0.0195881
ENSBTAG00000021328	2	116086973	116277103	SPHKAP	-4.3277	0.0443763
ENSBTAG00000021566	26	21590656	21680714	PAX2	-1.27369	0.024503
ENSBTAG00000021681	19	10125434	10153162	PRR11	-1.0342	0.0271431
ENSBTAG00000021867	13	37876842	37916420	BFSP1	4.34923	0.0329448
ENSBTAG00000021969	11	75240502	75572709	KLHL29	-1.01525	0.0361325
ENSBTAG00000022715	26	42474359	42491825	-	2.23337	0.0154452
ENSBTAG00000022807	18	62587896	62594465	KIR3DS1	1.02036	0.0271234
ENSBTAG00000022886	28	9910803	10517659	RYR2	3.78832	0.012272
ENSBTAG00000023666	1	42936757	42941412	-	1.0621	0.00920836
ENSBTAG00000024904	7	4967285	4978003	IQCN	-2.8179	0.0453157
ENSBTAG00000025035	20	38971752	39100563	PRLR	-1.1738	0.0177548
ENSBTAG00000026527	20	71681786	71694743	-	-1.75806	0.0352247
ENSBTAG00000026637	9	40776340	40863105	-	-2.47271	0.00780638
ENSBTAG00000030190	3	116782465	116855219	COL6A3	-1.07421	0.0136664
ENSBTAG00000030258	5	109423829	109432050	CDC42EP1	-2.14779	0.00677085
ENSBTAG00000030416	18	61486796	61488199	-	2.29805	0.0469018
ENSBTAG00000030423	5	99905264	99936312	CLEC1B	1.2542	0.0313491
ENSBTAG00000030424	5	99860312	99880739	CLEC1A	1.66778	0.00242925
ENSBTAG00000030472	5	98558817	98559755	TAS2R42	-4.90781	0.0045949
ENSBTAG00000030624	13	73482621	73485588	WFDC5	-2.21115	0.0298137
ENSBTAG00000030690	25	39135358	39189367	RADIL	1.1604	0.00752554
ENSBTAG00000031115	22	57132772	57172276	-	-3.31042	0.0389554
ENSBTAG00000031351	17	69451575	69467562	SEC14L4	1.22996	0.0226624
ENSBTAG00000031352	7	20868563	20873708	ZNF554	-1.31211	0.011052
ENSBTAG00000031354	13	62824630	62843810	-	-1.87642	0.0483516
ENSBTAG00000031582	25	27778005	27778361	-	-1.02651	0.0051594
ENSBTAG00000032152	5	75494237	75529894	TMPRSS6	-1.71952	0.0316231
ENSBTAG00000032206	8	63102557	63121637	HEMGN	1.5875	0.0418565
ENSBTAG00000032521	11	25888955	25993933	PLEKHH2	-1.52968	0.02755
ENSBTAG00000033140	27	39292884	39388231	LRRC3B	3.93129	0.00855735
ENSBTAG00000034551	24	50563415	50563578	U1	1.39688	0.0223544
ENSBTAG00000035945	4	50056455	50082481	-	1.54541	2.57e-05
ENSBTAG00000036154	4	50142139	50162526	TARP	1.2473	0.0106444
ENSBTAG00000036257	NKLS02002206.1	13885	23089	-	-1.84051	0.0184586
ENSBTAG00000037452	10	26644523	26648616	-	-2.25904	0.00344164
ENSBTAG00000037534	5	100228198	100238336	KLRF1	-1.3516	0.00235559
ENSBTAG00000037800	5	110530859	110534614	APOBEC3Z1	-1.21207	0.000281793
ENSBTAG00000038258	17	72394831	72398818	-	1.98544	0.0107586
ENSBTAG00000038584	11	105560462	105581640	OLFM1	3.39273	0.0435014
ENSBTAG00000038938	3	54409369	54433538	GBP2	-1.46104	0.0351757
ENSBTAG00000038945	2	135238391	135258340	PADI6	-2.72695	0.0348227
ENSBTAG00000039046	2	117785379	117787180	CD24	-1.32768	6.26e-06
ENSBTAG00000039116	23	29344338	29345285	-	-5.0899	0.022658
ENSBTAG00000039682	27	19567096	19632311	MTUS1	2.00302	0.0129714
ENSBTAG00000039714	NKLS02000910.1	775192	957150	-	1.00079	0.0357802
ENSBTAG00000042644	13	47487786	47487891	-	-1.14847	0.00806641
ENSBTAG00000043508	19	27820782	27820917	U8	2.26262	0.0196865
ENSBTAG00000043542	9	13129769	13129871	U6	3.74544	0.0326864
ENSBTAG00000043548	MT	364	430	-	3.44218	0.000481071
ENSBTAG00000043555	MT	3024	3098	-	1.65676	0.0398951
ENSBTAG00000043565	MT	4123	4194	-	2.06034	0.0201092
ENSBTAG00000043972	8	24532716	24812024	SLC24A2	1.59485	0.0221028
ENSBTAG00000044185	15	35833980	36542301	SOX6	1.81878	0.0370907
ENSBTAG00000044676	5	110533065	110533171	U6	-1.63872	0.0173128
ENSBTAG00000045507	18	13698486	13709861	ZNF469	-1.16946	0.00628128
ENSBTAG00000045806	18	46053846	46054748	FFAR1	-1.02157	0.0342228
ENSBTAG00000045822	15	74043979	74045355	C15H11orf96	1.8133	0.000517722
ENSBTAG00000045895	16	2608815	2800803	NFASC	1.63625	0.0231506
ENSBTAG00000045905	26	4657603	5569857	PCDH15	-5.24932	0.0136163
ENSBTAG00000045934	X	101900340	101901350	GPR82	-1.06534	0.0126593
ENSBTAG00000045946	19	26574918	26576224	VMO1	2.97628	0.0185325
ENSBTAG00000046121	14	76962714	76967783	-	2.07963	0.0213952
ENSBTAG00000046283	19	9665675	9666220	-	-4.52395	0.0259993
ENSBTAG00000046350	16	79787223	79824967	PKP1	3.79366	0.0113477
ENSBTAG00000046383	18	62453964	62454894	-	-2.04053	8.6e-05
ENSBTAG00000046419	11	1621368	1674858	TPC3	-1.94436	0.00898279
ENSBTAG00000046547	24	42779034	42792110	CIDEA	1.97523	0.0068212
ENSBTAG00000047147	1	42070368	42196081	CRYBG3	1.24696	0.00107315
ENSBTAG00000047302	13	67292055	67307842	-	2.3906	7.65e-05
ENSBTAG00000047473	18	62490163	62504128	-	-1.41819	0.0355321
ENSBTAG00000047605	4	98980494	99055474	-	-1.41948	0.0151341
ENSBTAG00000047764	NKLS02001494.1	460932	609669	-	-2.19261	0.0144195
ENSBTAG00000047810	6	113508435	113511325	CCDC96	-1.24658	0.0350197
ENSBTAG00000048010	21	69532009	69539133	NUDT14	1.01852	0.0257296
ENSBTAG00000048401	25	35564665	35565731	-	-4.08835	0.0182263
ENSBTAG00000048420	18	62937680	62942083	-	-1.73339	0.000407543
ENSBTAG00000048523	22	17008743	17010566	-	-1.51717	0.0268861
ENSBTAG00000048533	14	37324498	37325736	-	-3.5444	0.0346233
ENSBTAG00000048632	26	18856853	18861254	-	-3.47306	0.00923178
ENSBTAG00000048688	11	94833161	94834255	-	1.26505	0.0408278
ENSBTAG00000048784	10	25366947	25367231	-	2.13339	0.00930633
ENSBTAG00000048817	X	86550779	86560943	SSX5	2.39212	0.0324583
ENSBTAG00000048946	23	29167187	29168701	-	-2.86703	0.0442737
ENSBTAG00000049052	15	40780918	40782042	-	-1.12585	0.0478671
ENSBTAG00000049113	27	24471292	24481185	-	-1.3851	0.00270274
ENSBTAG00000049239	3	94291017	94292495	-	-2.17549	0.025687
ENSBTAG00000049300	19	43006019	43011475	AARSD1	1.30828	0.0279111
ENSBTAG00000049399	4	82745643	82745786	-	1.50134	0.000155474
ENSBTAG00000049774	NKLS02002208.1	5430756	5510316	-	-4.34746	0.0390258
ENSBTAG00000050031	20	14468519	14473359	-	-1.75976	0.034056
ENSBTAG00000050048	21	33915674	33919476	-	-3.16204	0.0460119
ENSBTAG00000050202	17	63283157	63288031	-	-1.34742	0.0354102
ENSBTAG00000050494	4	106506468	106513124	-	5.12912	0.0447008
ENSBTAG00000050524	21	63927109	63950331	-	4.27295	0.0477784
ENSBTAG00000050534	3	32261528	32264893	-	-4.5508	0.0267248
ENSBTAG00000050596	10	58450776	58453588	-	-1.88713	0.0136023
ENSBTAG00000050628	6	72259990	72279687	-	2.55295	0.0414967
ENSBTAG00000050760	23	8621658	8626884	-	-1.50068	0.0341457
ENSBTAG00000051091	10	34283930	34331506	-	1.7501	0.0108277
ENSBTAG00000051116	23	15831094	15865906	C6orf132	1.25169	0.00240962
ENSBTAG00000051222	13	23626687	23626767	bta-mir-2285k-2	-1.37057	0.0483884
ENSBTAG00000051324	21	69699935	69700769	-	1.44082	0.0360549
ENSBTAG00000051509	22	59323689	59346259	-	-2.80362	0.0267519
ENSBTAG00000051550	11	10122252	10124335	TLX2	2.92802	0.0061713
ENSBTAG00000051558	17	55434294	55435295	-	-2.90877	0.0309443
ENSBTAG00000051625	16	75556041	75557325	-	-1.62458	0.039675
ENSBTAG00000051630	2	92793751	92797284	-	3.94652	0.00489393
ENSBTAG00000051653	13	60378067	60390330	SCRT2	1.74405	0.00103435
ENSBTAG00000051681	3	12615376	12631769	-	-1.06723	0.0458079
ENSBTAG00000051811	4	105767865	105769138	-	1.30784	0.0335832
ENSBTAG00000051829	7	107778263	107799696	-	1.17972	0.045735
ENSBTAG00000051848	10	71769798	71771150	-	5.2891	0.00307587
ENSBTAG00000052294	23	30026121	30031573	-	3.02782	0.0437182
ENSBTAG00000052355	5	102220411	102267444	WC1-12	1.00572	0.00641967
ENSBTAG00000052465	9	42992439	42996483	-	-1.01838	0.00581421
ENSBTAG00000052475	10	2296684	2323467	-	-4.7835	0.0182047
ENSBTAG00000052547	23	29321579	29322505	-	-4.63214	0.0285617
ENSBTAG00000052560	16	79090731	79092533	-	-3.04223	0.0265426
ENSBTAG00000052718	12	48944958	48972496	-	-1.07399	0.0496717
ENSBTAG00000052902	3	10590184	10620283	-	-1.5694	0.0472496
ENSBTAG00000053051	13	63098169	63100404	-	-1.13976	0.0157624
ENSBTAG00000053178	12	16231498	16231988	-	-1.37944	0.0172822
ENSBTAG00000053242	5	101827292	101831737	-	1.2621	0.0497108
ENSBTAG00000053260	7	71663189	71664889	-	-1.1126	0.0176997
ENSBTAG00000053361	3	117474216	117483608	KLHL30	2.89725	0.000610646
ENSBTAG00000053373	NKLS02001494.1	256179	263860	-	-2.35015	0.035471
ENSBTAG00000053424	7	5751646	5755931	-	-2.11344	6.96e-05
ENSBTAG00000053500	5	74430343	74435609	-	-1.24488	0.000202571
ENSBTAG00000053502	4	50099256	50100893	-	1.48424	0.0102586
ENSBTAG00000053508	21	312642	314960	-	-2.61723	5.3e-05
ENSBTAG00000053521	29	51007865	51008778	-	-2.74779	0.0463572
ENSBTAG00000053545	26	42420916	42432455	-	2.19773	0.0224715
ENSBTAG00000053611	1	67323374	67328427	-	-4.21061	0.0312814
ENSBTAG00000053661	13	74222899	74227610	-	1.44606	0.00452112
ENSBTAG00000053729	29	36198714	36219426	-	-2.11136	0.0332203
ENSBTAG00000053790	12	22400962	22449671	-	1.04722	0.0121222
ENSBTAG00000053793	29	49746689	49755832	-	-1.44464	0.00776914
ENSBTAG00000053827	11	106142573	106144612	-	2.87368	0.00440968
ENSBTAG00000054063	3	11858601	11863244	CD1A	1.49289	0.0111165
ENSBTAG00000054152	3	109409054	109410469	-	-1.28417	0.0471228
ENSBTAG00000054363	11	103916535	103921096	-	1.15736	0.0362793
ENSBTAG00000054367	5	108138474	108154024	WNT5B	3.95299	0.0129144
ENSBTAG00000054407	NKLS02000591.1	71378	74747	-	3.73565	0.000544348
ENSBTAG00000054705	NKLS02000591.1	142382	145353	-	2.22831	0.0202571
ENSBTAG00000054748	22	21003342	21015245	-	5.23738	0.0145301
ENSBTAG00000054768	NKLS02001928.1	332534	349756	-	-1.34144	0.0215695
ENSBTAG00000054949	NKLS02000591.1	13808	23769	-	1.01286	0.0196606
ENSBTAG00000054978	4	99079895	99088132	-	1.11716	3.14e-05
ENSBTAG00000055104	22	16416500	16417480	ZKSCAN7	-1.60541	0.0135525
ENSBTAG00000055254	4	82692176	82710398	-	1.45327	0.0320794
ENSBTAG00000055300	13	73322026	73331183	-	-2.59038	0.0460745
